# Supplementary material for: Environmental Justice in Industrially Contaminated Sites. A Review of Scientific Evidence in the WHO European Region
Source: Int J Environ Res Public Health. 2019 Mar 19;16(6):998. doi: 10.3390/ijerph16060998 (PMC6466395; doi:10.3390/ijerph16060998)
Supplement: Supplementary file 1 [file ijerph-16-00998-s001.xlsx]

## Sheet: ind cont sites_eligib asbtracts
AUTHORS	TITLE	REFERENCE	TYPE OF STUDY DISTRIBUTIVE/PROCEDURAL	COUNTRY	TYPE OF CONTAMINATION	SOCIAL DETERMINANTS (EQUITY DIMENSION)	DATA/IFORMATION ON CONTAMINATION/EXPOSURE OR/AND HEALTH	NATIONAL/LOCAL ASSESSMENT	LEVEL OF INFERENCE
Laurian L, Funderburg R.	environmental justice in France? A spatio-temporal analysis of incinerator location	Journal of environmental Planning and Management 2014, 57(3):424-446. 10.1080/09640568.2012.749395	Distributive	France	incinerators	SEP, ethnicity (foreigners)	contamination	national	communes (towns)
Viel JF, Hägi M, Upegui E, Laurian L.	Environmental justice in a French industrial region: are polluting industrial facilities equally distributed?	Health Place 2011; 17(1):257-62. doi: 10.1016/j.healthplace.2010.10.007	Distributive	France	industrial pollution	SEP, ethnicity (foreigners)	contamination	local	small-areas (IRISes in of the region Franche-Comte´)
Kershaw S, Gower S, Rinner C, Campbell M.	Identifying inequitable exposure to toxic air pollution in racialized and low-income neighbourhoods to support pollution prevention	Geospatial Health 2013; 7(2): 265-278.	Distributive	Canada	industrial pollution	SEP	exposure	local	small-areas
Ash M, Boyce JK, Chang G, Scharber H.	Is environmental justice good for white folks? Industrial air toxics exposure in Urban America	Social Science Quarterly 2013; 94(3), 616-636.	Distributive	U.S.	industrial pollution	ethnicity	exposure	national	small-areas (geographic microdata)
Perera PKP, Lam N.	An environmental justice assessment of the mississippi river industrial corridor in Louisiana, U.S. using a gis-based approach	Applied Ecology and Environmental Research 2013; 11(4): 681-697	Distributive	U.S.	industrial pollution	SEP, minorities	contamination	local	pareshes along the Mississippi River Industrial Corridor in Lusiana
Morrison S, Fordyce FM, Scott EM.	An initial assessment of spatial relationships between respiratory cases, soil metal content, air quality and deprivation indicators in Glasgow, Scotland, UK: relevance to the environmental justice agenda	environmental Geochemistry and Health 2014, 36(2SI):319-332. 10.1007/s10653-013-9565-4	Distributive	Scotland	soil metal content, air pollution (NO2/PM10)	SEP	contamination+health	local	Glasgow conurbation
Frantal B, Novakova E.	A curse of coal? Exploring unintended regional consequences of coal energy in the Czech Republic	Moravian Geographical Reports.2014;22(2):55-65	Distributive	Czech Republic	heavy industry - coal power plants	ethnicity (immigrants), education, SEP	contamination	national	national districts (NUTS4)
Funderburg R, Laurian L.	Bolstering environmental (in)justice claims with a quasi-experimental research design	Land Use Policy.2015;49:511-526 doi:10.1016/j.landusepol.2015.08.015	Distributive	France	incinerators	ethnicity (foreigners)	contamination	national	communes (towns)
Richardson EA, Shortt NK, Mitchell RJ.l.	The mechanism behind environmental inequality in Scotland: Which came first, the deprivation or the landfill?	Environment and Planning A.2010;42(1):223-240 doi:10.1068/a41376	Distributive	Scotland	landfills	SEP (socially deprivated areas)	exposure	national	small-areas (Continous Areas Through time - 500 persons)
Ruttenauer T.	Neighbours matter: A nation-wide small-area assessment of environmental inequality in Germany.	Social science research.2018;70:198-211 doi:10.1016/j.ssresearch.2017.11.009	Distributive	Germany	industrial pollution	SEP	contamination	national	small-areas (geographical areas with ana average of 778 inhabitants)
Raddaz L, Mennis J.	environmental Justice in Hamburg, Germany	Professional Geographer.2013;65(3):495-511 doi:10.1080/00330124.2012.700500	Distributive	Germany	industrial pollution	ethnicity (foreigners), SEP	contamination	local	Niighbourhoods in Hamburg
Riva M, Terashima M, Curtis S, et al.	Coalfield health effects: Variation in health across former coalfield areas in England	Health and Place. 2011;17(2)588-597 doi:10.1016/j.healthplace.2010.12.016	Distributive	England	coalfield areas	SEP	contamination+health	national	Population/residents in areas close the contamination source
Schwarz l, Benmarhnia T, Laurian L.	Social Inequalities Related to Hazardous Incinerator Emissions: An Additional Level of environmental Injustice	environmental justice.2015;8(6):213-219 doi:10.1089/env.2015.0022	Distributive	France	incinerators	ethnicity (foreigners), SEP	contamination	local	communes (towns)
Flanquart H, Hellequin AP, Vallet P.	Living alongside hazardous factories: risk, choice and necessity	Health, Risk and Society.2013;15(8):663-680 doi:10.1080/13698575.2013.855714	Procedural	France	heavy industry: chemical (Seveso plants)	social capital (Literacy), SEP	contamination	local	a village (Mardyck village within the urban area of Dunkirk)
Persson et al.	What local people? Examining the Gallok mining conflict and the rights of the Sarni population in terms of justice and power	Geoforum.2017;86:20-29 doi:10.1016/j.geoforum.2017.08.009	Procedural	Sweden	mines	ethnicity (Sami indigenous population), Asimmetric power relations	contamination	local	Town (Gallok)
Schonach P.	Historical paths of environmental injustice: a century of placing industrial facilities in Helsinki, Finland	Local Environment.2016;21(4):397-413 doi:10.1080/13549839.2014.985641	Procedural	Finland	industrial facilities (power plants, waste disposal)	SEP	contamination	local	a town district (Helsinki, Sörnäinen district)
Suopajärvi L, Ejdemo T, Klyuchnikova E, Korchak E, et al.	Social impacts of the “glocal” mining business: case studies from Northern Europe	Mineral Economics.2017;30(1):31-39	Procedural	Nothern Europe	mines	social capital, asimmetric power relations	contamination	local	Communities resident in areas arond the contamination source
Abel TD, White J.	Skewed Riskscapes and Gentrified Inequities: environmental Exposure Disparities in Seattle, Washington	American Journal of Public Health 2011, 101(1):S246-S254. 10.2105/AJPH.2011.300174	Distributive	U.S.	air toxic pollution from industrial sources	occupation, SEP, minorities	contamination	local	census block groups in Seattle
Ard K.	Trends in exposure to industrial air toxins for different racial and socioeconomic groups: A spatial and temporal examination of environmental inequality in the US from 1995 to 2004	Social Science Research 2015, 53:375-390. 10.1016/j.ssresearch.2015.06.019	Distributive	U.S.	air toxic pollution from industrial sources	ethnicity, SEP	exposure	national	census block groups
Ash M, Boyce JK.	Measuring corporate environmental justice performance	Corporate Social Responsibility and environmental Management 2011, 18(2):61-79. 10.1002/csr.238	Distributive	U.S.	air toxic pollution from industrial sources	ethnicity, SEP	contamination	national	areas close air polluters
Collins M.B.	Risk-Based Targeting: Identifying Disproportionalities in the Sources and Effects of Industrial Pollution	Am J Public Health. 2011;101:S231-S237. doi:10.2105/AJPH.2011.300120	Distributive	U.S.	air toxic pollution from industrial sources	socio-demographic	exposure+health	local	Town. Milwaukee. Population/residents in areas close the contamination source
De Silva DG, Hubbard TP, Schiller AR.	Entry and exit patterns of "Toxic" firms	American Journal of Agricultural Economics.2016;98(3):881-909 doi:10.1093/ajae/aaw012	Distributive	U.S.	industrial facilities	Ethnicity	contamination	local	Texas. Population/residents in areas close the contamination source
Arellano-Yanguas J.	Inequalities in mining and oil regions of Andean countries	Iberoamerican Journal of Development Studies 2017, 6(2):99-122. 10.26754/ojs_ried/ijds.255	Procedural	Peru and Colombia	mines and oil fields	SEP	contamination	local	territorial groups
Han I, Guo Y, Afshar M, et al.	Comparison of trace elements in size-fractionated particles in two communities with contrasting socioeconomic status in Houston, TX	environmental Monitoring and Assessment 2017, 189(2):67. 10.1007/s10661-017-5780-2	Distributive	U.S.	air toxic pollution from petrochemical industry (and other sources)	SEP	contamination	local	city of Huston
Batisse E, Goudreau S, Baumgartner J, et al.	Socio-economic inequalities in exposure to industrial air pollution emissions in Quebec public schools	Canadian Journal of Public Health 2017, 108(5-6):e503-e509. 10.17269/cjph.108.6166	Distributive	Canada	air toxic pollution from industrial sources	SEP	exposure	local	public schools in Quebec
Huang H, Tornero-Velez R, Barzyk TM.	Associations between socio-demographic characteristics and chemical concentrations contributing to cumulative exposures in the United States.	Journal of exposure science & environmental epidemiology 2017,27(6):544-550. 10.1038/jes.2017.15	Distributive	U.S.	air toxic pollutants	ethnicity, education, SEP, age	contamination	national	Populations in Census tracts
Chakraborty J, Green D.	Australia's first national level quantitative environmental justice assessment of industrial air pollution	environmental Research Letters 2014, 9(4):1-10. 10.1088/1748-9326/9/4/044010	Distributive	Australia	air toxic pollution from industrial sources	ethnicity, education, occupation, SEP	contamination	national	communities
Johnson R, Ramsey-White K, Fuller CH.	Socio-demographic Differences in Toxic Release Inventory Siting and Emissions in Metro Atlanta	International Journal of environmental Research and Public Health 2016, 13(8):747. 10.3390/ijerph13080747	Distributive	U.S.	toxic polluting facilities	ethnicity, education, SEP	contamination	local	20-county Atlanta Metropolitan Statistical Area
Lobao L, Zhou M, Partridge M, et al.	Poverty, Place, and Coal Employment across Appalachia and the United States in a New Economic Era	Rural Sociology 2016,81(3):343-386. 10.1111/ruso.12098	Distributive	U.S.	coal industry (coal employment)	SEP	contamination	local	Appalachian communities
Dowling R, Ericson B, Caravanos J, et al.	Spatial Associations Between Contaminated Land and Socio Demographics in Ghana	International Journal of environmental Research and Public Health.2015;12(10):13587-13601 doi:10.3390/ijerph121013587	Distributive	Ghana	contaminated sites	SEP, education, literacy	contamination	national	aggregated district level
Miller JF, Davidson CI, Lange DA, Meyer Grelli ML.	Brownfields and environmental justice: Income, education, and race	environmental Justice 2011, 4(2):121-124. 10.1089/env.2010.0002	Distributive	U.S.	brownfields	SEP	contamination	national	population/residents in areas close the contamination source
Mohai P, Saha R.	Which came first, people or pollution? Assessing the disparate siting and post-siting demographic change hypotheses of environmental injustice	environmental Research Letters 2015, 10(11):115008. 10.1088/1748-9326/10/11/115008	Distributive	U.S.	hazardous waste facilities	ethnicity, SEP	contamination	national	population/residents in areas close the contamination source
Morey BN.	environmental justice for native Hawaiians and Pacific Islanders in Los Angeles County	environmental Justice 2014, 7(1):9-17. 10.1089/env.2014.0003	Distributive	U.S.	toxic waste, industrial air pollution	ethnicity	contamination	local	Los Angeles county. Population/residents in areas close the contamination source
Hajkowicz SA, Heyenga S, Moffat K.	The relationship between mining and socio-economic well being in Australia's regions	Resources Policy 2011, 36(1):30-38. 10.1016/j.resourpol.2010.08.007	Distributive	Australia	mines	occupation, education, SEP	contamination	national	local government areas containing maining
Sansom G, Parras J, Parras A, et al.	The Impacts of Exposure to environmental Risk on Physical and Mental Health in a Small Geographic Community in Houston, TX.	Journal of community health.2017;42(4)813-818 doi:10.1007/s10900-017-0322-y	Distributive	U.S.	industrial sites	place of residence	contamination+health	local	Manchester Neighborhood in Huston - the community of residenets in the area
He Q, Fang H, Ji H, et al.	environmental inequality in China: A "pyramid model" and nationwide pilot analysis of prefectures with sources of industrial pollution	Sustainability (Switzerland) 2017, 9(10):1971. 10.3390/su9101871	Distributive	China	industrial pollution	ethnicity, SEP, migration	contamination	national	prefecture level
Sicotte D.	Some more polluted than others: Unequal cumulative industrial hazard burdens in the Philadelphia MSA, USA	Local Environment. 2010;15(8):761-774 doi:10.1080/13549839.2010.509384	Distributive	U.S.	Superfound sites, hazardous waste facilities, landfills power plants, polluting factories, and sewage and sludge treatment facilities	ethnicity (minorities), education	contamination	local	Philadelphia county (357 towns and 12 city in the nine-county Philadelphia Metropolitan Statistical Area).Communities resident in areas close the contamination source
Sicotte D.	Diversity and Intersectionality among environmentally Burdened Communities in the Philadelphia Metropolitan Area, USA	Urban Studies.2014;51(9):1850-1870 doi:10.1177/0042098013502827	Distributive	U.S.	hazardous facilities	ethnicity, SEP	contamination	local	Philadelphia county. Communities resident in areas close the contamination source
Downey L, Crowder L, Kemp RJ.	Family Structure, Residential Mobility, and environmental Inequality	Journal of Marriage and Family.2017;79(2):535-555 doi:10.1111/jomf.12355	Distributive	U.S.	industrial pollution	family structure	contamination	national	residential proximity to neighborhood pollution
Lagos G, Blanco Edgar E.	Mining and development in the region of Antofagasta	Resources Policy 2010, 35(4):265-275. 10.1016/j.resourpol.2010.07.006	Distributive	Cile	mines	place of residence, occupation, education, SEP	contamination	local	region of Antofagasta
Greenberg P.	Disproportionality and Resource-Based environmental Inequality: An Analysis of Neighborhood Proximity to Coal Impoundments in Appalachia	Rural Sociology.2017;82:149-178 doi:10.1111/ruso.12119	Distributive	U.S.	coal impudents and coal mining	SEP	contamination	local	Population/residents in areas close the contamination source in Appalachia
Loayza N, Rigolini J.	The Local Impact of Mining on Poverty and Inequality: Evidence from the Commodity Boom in Peru	World Development 2016, 84:219-234. 10.1016/j.worlddev.2016.03.005	Distributive	Peru	mines	ethnicity, SEP	contamination	national	mining district in Peru
Grineski SE, Collins TW.	environmental injustices in transnational context: Urbanization and industrial hazards in El Paso/Ciudad juárez	Environment and Planning A.2010;42(6):1308-1327 doi:10.1068/a42392	Distributive	U.S.-Mexico borderlands	industrial facilities	ethnicity (migrants), SEP	contamination	local	2 towns: El Paso and Ciudad Juarez
Ma C.	Who bears the environmental burden in China-An analysis of the distribution of industrial pollution sources?	Ecological Economics 2010, 69(9):1869-1876. 10.1016/j.ecolecon.2010.05.005	Distributive	China	industrial pollution	ethnicity, SEP, migration	contamination	local	Henan province
Staudt K, Dane'El M, Marquez-Velarde G.	In the shadow of a steel recycling plant in these neoliberal times: Health disparities among Hispanics in a border colonia	Local Environment.2015;21(5)636-652 doi:10.1080/13549839.2015.1016902	Distributive	U.S.-Mexico borderlands	Steel recycling plant	ethnicity, SEP	contamination+health	local	Communities resident in areas close the contamination source
Wilson SM, Fraser-Rahim H, Zhang H, et al.	The spatial distribution of leaking underground storage tanks in Charleston, South Carolina: An environmental justice analysis	environmental Justice.2012;5(4):198-205 doi:10.1089/env.2012.0011	Distributive	U.S.	leaking underground storage tanks	ethnicity, SEP	contamination	local	Town - Charleston
Zou B, Peng F, Wan N et al.	Sulfur dioxide exposure and environmental justice: A multi-scale and source-specific perspective	Atmospheric Pollution Research.2014;5(3):491-499 doi:10.5094/APR.2014.058	Distributive	U.S.	industrial pollution (by source of pollution including industries)	ethnicity, education, SEP	exposure	local	Population/residents in areas close the contamination source (alanalysis at different spatial scales)
Aoyagi H, Ogunseitan OA.	Toxic Releases and Risk Disparity: A Spatiotemporal Model of Industrial Ecology and Social Empowerment	International Journal of environmental Research and Public Health, 2015;12(6):6300-6318. 10.3390/ijerph120606300	Distributive and Procedural	U.S.	air toxic pollution from industrial sources	ethnicity, SEP	exposure	local	Los Angeles urban area + individual level + communities level
Phelan AA, Dawes L, Costanza R, et al.	Evaluation of social externalities in regional communities affected by coal seam gas projects: A case study from Southeast Queensland	Ecological Economics.2017;131:300-311 doi:10.1016/j.ecolecon.2016.09.010	Procedural	Australia	coal Seam Gas (cSG) pollution	place of residence of regional communities, social capital	contamination	local	Region (Surat Basin /Southest Queensland)
Saha S, Pattanayak SK, Sills EO, et al.	Under-mining health: environmental justice and mining in India.	Health and Place.2011;17(1):140-148 doi:10.1016/j.healthplace.2010.09.007	Distributive	India	mines	place of residence	contamination+health	national	rural India, villages. Population/residents in areas close the contamination source
Aliyu AA, Kasim R, Martin D.	Siting of hazardous waste dump facilities and their correlation with status of surrounding residential neighbourhoods in Los Angeles County	Property Management 2011, 29(1):87-102. 10.1108/02637471111102941	Procedural	U.S.	hazardous waste from industrial sources	occupation, SEP, minorities	contamination	local	Los Angeles County
Schoolman ED, Ma C.	Migration, class and environmental inequality: Exposure to pollution in China's Jiangsu Province	Ecological Economics.2012;75:140-151 doi:10.1016/j.ecolecon.2012.01.015	Distributive	China	industrial pollution	ethnicity (rural migrants)	contamination	local	Province (Jiangsu)
Ard K, Colen C, Becerra M, et al.	Two Mechanisms: The Role of Social Capital and Industrial Pollution Exposure in Explaining Racial Disparities in Self-Rated Health	International Journal of environmental Research and Public Health 2016, 13(10):1025. 10.3390/ijerph13101025	Procedural	U.S.	air toxic pollution from industrial sources	ethnicity, SEP, social capital	contamination+health	national	individuals + communities
Burda M, Harding M.	environmental Justice: Evidence from Superfund cleanup durations	Journal of Economic Behavior and Organization 2014, 107(PA):380-401. 10.1016/j.jebo.2014.04.028	Procedural	U.S.	toxic waste	ethnicity, education, SEP	contamination	national	superfund sites
Johnson Gaither C.	Smokestacks, Parkland, and Community Composition: Examining environmental Burdens and Benefits in Hall County, Georgia, USA	Environment and Behavior 2015, 47(10):1127-1146. 10.1177/0013916514546744	Procedural	U.S.	industrial facilities	ethnicity, SEP, minorities	contamination	local	census block groups
Leciejewski M, Perkins HA.	environmental Justice in Appalachia: Procedural Inequities in the Mine Permitting Process in Southeast Ohio	environmental Justice 2015, 8(4):111-116. 10.1089/env.2015.0010	Procedural	U.S.	coal mine	ethnicity	contamination	local	Athens County - Appalachia comunity
Morales Jr O, Grineski SE, Collins TW.	Structural violence and environmental injustice: the case of a US-Mexico border chemical plant	Local Environment 2012, 17(1):1-21. 10.1080/13549839.2011.627321	Procedural	U.S.-Mexico borderlands	chemical plant	socio-environmental marginalities	contamination	local	population/residents in areas close the contamination source
Sicotte D.	Don't waste us: environmental justice through community participation in urban planning	Environemntal Justice.2010;3(1):7-11 doi:10.1089/env.2009.0025	Procedural	U.S.	waste disposal and industrial facilities	ethnicity, SEP	contamination	local	Population/residents in areas close the contamination source
Yoon DK, Kang JE, Park J.	Exploring environmental Inequity in South Korea: An Analysis of the Distribution of Toxic Release Inventory (TRI) Facilities and Toxic Releases	Sustainability.2017;9(10) doi:10.3390/su9101886	Distributive	South Corea	toxic pollution from industrial sources	ethnicity, SEP	contamination	national	230 local governaments
Staudt K, Marquez-Velarde G, Dane'EL M.	Stories, science, and power in policy change: environmental health, community-based research, and community organizing in a U.S.-Mexico border Colonia	environmental Justice.2013;6(6):191-199 doi: 10.1089/env.2013.0041	Procedural	U.S.	industrial areas	ethnicity, SEP	contamination	local	Communities resident in areas arond the contamination source
